# Supplementary material for: Functional genomic analysis reveals overlapping and distinct features of chronologically long-lived yeast populations
Source: Aging (Albany NY). 2015 Mar 7;7(3):177–94. doi: 10.18632/aging.100729 (PMC4394729; doi:10.18632/aging.100729)
Supplement: Supplementary file 1 [file aging-07-0177-s001.xlsx]

## Sheet: Sheet1
Supplemental Table S1. Fold changes (log2) in transcription relative to WT NR
		Calorie Restriction		ade4∆
ORF	Description	p-value	Fold Change	p-value	Fold Change
YDR111C	ALT2	0.123	5.71	0.166	4.63
YPR001W	CIT3	0.006	5.45	0.052	2.91
YHR139C	SPS100	0.096	3.91	0.058	4.43
YER019W	ISC1	0.198	4.09	0.188	4.06
YMR303C	ADH2	0.023	4.78	0.078	3.21
YHR208W	BAT1	0.048	3.85	0.057	3.53
YGL009C	LEU1	0.16	3.81	0.172	3.49
YKL029C	MAE1	0.144	3.86	0.162	3.44
YOL059W	GPD2	0.07	3.69	0.077	3.35
YER086W	ILV1	0.179	3.31	0.131	3.6
YNR050C	LYS9	0.16	2.94	0.065	3.93
YNL072W	RNH201	0.124	3.4	0.096	3.46
YCR010C	ADY2	0.015	4.29	0.089	2.49
YLR058C	SHM2	0.198	3.4	0.187	3.37
YKL081W	TEF4	0.056	3.73	0.096	2.93
YOL058W	ARG1	0.078	3.32	0.072	3.19
YEL047C	FRD1	0.195	2.79	0.102	3.52
YKL096W-A	CWP2	0.046	3.18	0.049	2.98
YJL158C	CIS3	0.013	4.2	0.175	1.76
YNR016C	ACC1	0.072	3.08	0.075	2.84
YHR137W	ARO9	0.004	3.56	0.007	2.35
YCL008C	STP22	0.144	2.57	0.065	3.25
YDR234W	LYS4	0.145	2.6	0.074	3.17
YMR217W	GUA1	0.078	2.67	0.042	3.05
YDL014W	NOP1	0.055	3.11	0.083	2.51
YLR432W	IMD3	0.006	2.72	0.003	2.89
YPL231W	FAS2	0.096	2.93	0.1	2.66
YLR286C	CTS1	0.013	3.92	0.185	1.63
YDL085W	NDE2	0.151	2.36	0.062	3.12
YGR204W	ADE3	0.157	2.63	0.131	2.68
YIL053W	RHR2	0.091	2.52	0.058	2.76
YGR159C	NSR1	0.055	2.36	0.027	2.91
YBR069C	TAT1	0.063	2.87	0.104	2.26
YPL092W	SSU1	0.015	2.73	0.028	2.37
YPL170W	DAP1	0.182	1.82	0.034	3.28
YAL020C	ATS1	0.198	2.36	0.131	2.72
YML113W	DAT1	0.151	2.73	0.189	2.31
YNL045W	LAP2	0.178	2.5	0.16	2.52
YKR066C	CCP1	0.006	2.73	0.01	2.19
YDR352W	YPQ2	0.116	2.22	0.062	2.61
YER069W	ARG5,6	0.118	2.21	0.065	2.53
YDL171C	GLT1	0.046	1.88	0.009	2.76
YJL026W	RNR2	0.157	1.4	0.01	3.22
YHR025W	THR1	0.041	2.53	0.065	2.04
YJR105W	ADO1	0.157	2.12	0.097	2.42
YIL083C	CAB2	0.088	2.32	0.079	2.2
YMR244W	YMR244W	0.166	2.16	0.124	2.34
YDR384C	ATO3	0.019	3.09	0.192	1.36
YJL068C	YJL068C	0.124	2.23	0.104	2.2
YIL153W	RRD1	0.056	1.5	0.004	2.89
YOR271C	FSF1	0.078	2.07	0.048	2.31
YPR183W	DPM1	0.098	2.12	0.07	2.24
YDL131W	LYS21	0.182	1.85	0.078	2.51
YHR074W	QNS1	0.158	2.23	0.165	2.08
YLR212C	TUB4	0.128	2.35	0.178	1.88
YAL043C	PTA1	0.166	2.11	0.151	2.1
YDR127W	ARO1	0.11	1.98	0.071	2.16
YER073W	ALD5	0.113	1.92	0.064	2.21
YMR108W	ILV2	0.046	1.97	0.029	2.16
YBR104W	YMC2	0.028	2.02	0.028	2.01
YMR246W	FAA4	0.046	1.77	0.015	2.25
YMR085W	YMR085W	0.183	1.54	0.058	2.37
YMR170C	ALD2	0.167	1.69	0.077	2.2
YJL062W	LAS21	0.158	2	0.158	1.89
YDR380W	ARO10	0.101	1.86	0.065	2.02
YGL236C	MTO1	0.007	1.7	0.003	2.18
YJR004C	SAG1	0.126	1.68	0.052	2.18
YLR220W	CCC1	0.142	1.82	0.089	2.02
YML051W	GAL80	0.18	1.85	0.139	1.98
YHR216W	IMD2	0.02	1.77	0.011	1.98
YGL063W	PUS2	0.178	1.74	0.125	1.94
YBR249C	ARO4	0.056	1.6	0.024	2.05
YGL120C	PRP43	0.105	1.68	0.062	1.9
YHR018C	ARG4	0.006	1.28	0	2.25
YDR411C	DFM1	0.11	1.67	0.066	1.86
YBR220C	YBR220C	0.183	1.65	0.131	1.83
YIR026C	YVH1	0.062	1.64	0.037	1.83
YDR158W	HOM2	0.142	1.79	0.136	1.67
YER024W	YAT2	0.009	1.99	0.032	1.44
YKL185W	ASH1	0.006	2.3	0.065	1.13
YLR108C	YLR108C	0.176	1.33	0.058	2
YDR221W	GTB1	0.048	1.26	0.006	2.05
YEL026W	SNU13	0.056	1.89	0.115	1.39
YMR222C	FSH2	0.096	1.46	0.042	1.81
YFL021W	GAT1	0.055	1.89	0.119	1.34
YJR106W	ECM27	0.141	1.61	0.13	1.53
YGR260W	TNA1	0.006	1.52	0.003	1.6
YKL120W	OAC1	0.16	1.6	0.166	1.48
YKL191W	DPH2	0.058	1.2	0.01	1.83
YBR145W	ADH5	0.117	1.2	0.028	1.83
YHR128W	FUR1	0.02	1.59	0.033	1.39
YPL265W	DIP5	0.167	1.5	0.159	1.48
YDR354W	TRP4	0.078	1.31	0.031	1.66
YLR028C	ADE16	0.19	1.38	0.128	1.59
YFR044C	DUG1	0.062	1.85	0.192	1.11
YBR286W	APE3	0.126	1.47	0.116	1.41
YLL018C	DPS1	0.142	1.29	0.079	1.49
YGL208W	SIP2	0.176	1.4	0.165	1.38
YJL121C	RPE1	0.013	1.6	0.042	1.16
YOR108W	LEU9	0.07	1.05	0.01	1.71
YBR198C	TAF5	0.046	1.46	0.065	1.23
YGR175C	ERG1	0.198	1.16	0.098	1.51
YNL168C	FMP41	0.094	1.39	0.096	1.27
YOR355W	GDS1	0.16	1.17	0.078	1.47
YCL050C	APA1	0.027	0.93	0.003	1.7
YOR272W	YTM1	0.178	0.96	0.037	1.66
YOR011W	AUS1	0.101	1.46	0.148	1.16
YDL042C	SIR2	0.165	1.23	0.114	1.37
YHR019C	DED81	0.101	1.21	0.059	1.37
YDL195W	SEC31	0.171	1.23	0.136	1.29
YMR062C	ARG7	0.182	1.2	0.131	1.31
YNL049C	SFB2	0.09	1.46	0.164	1.04
YDL144C	YDL144C	0.114	1.34	0.16	1.08
YLR017W	MEU1	0.063	1.22	0.059	1.19
YMR221C	YMR221C	0.096	1.03	0.037	1.33
YPR181C	SEC23	0.019	1.37	0.059	0.98
YPR144C	NOC4	0.183	0.99	0.079	1.34
YKR050W	TRK2	0.046	1.49	0.179	0.83
YBR219C	YBR219C	0.012	1.13	0.01	1.16
YBR058C	UBP14	0.199	0.97	0.103	1.24
YAL022C	FUN26	0.078	1.02	0.041	1.18
YDR457W	TOM1	0.144	1.17	0.169	1.02
YPL012W	RRP12	0.145	0.84	0.033	1.35
YGL060W	YBP2	0.19	1.04	0.136	1.15
YEL071W	DLD3	0.144	1.09	0.128	1.06
YPR011C	YPR011C	0.02	1.38	0.119	0.76
YJR109C	CPA2	0.012	1.36	0.083	0.75
YJR070C	LIA1	0.152	0.88	0.062	1.17
YBR291C	CTP1	0.106	0.99	0.077	1.03
YHR123W	EPT1	0.132	0.93	0.079	1.04
YHR098C	SFB3	0.114	1.12	0.193	0.82
YCR052W	RSC6	0.062	0.73	0.01	1.17
YCL057W	PRD1	0.091	0.77	0.024	1.13
YJL012C	VTC4	0.179	0.95	0.18	0.9
YEL031W	SPF1	0.006	1.12	0.036	0.65
YBR140C	IRA1	0.11	0.89	0.114	0.81
YHR020W	YHR020W	0.028	0.64	0.005	0.99
YJL138C	TIF2	0.198	0.81	0.195	0.78
YNL080C	EOS1	0.118	0.85	0.195	0.63
YGR077C	PEX8	0.048	0.68	0.028	0.78
YLR266C	PDR8	0.106	0.58	0.059	0.67
YER068W	MOT2	0.071	0.44	0.179	0.28
YJR137C	MET5	0.028	-0.82	0.011	1
YJL197W	UBP12	0.164	-0.41	0.1	0.47
YIL169C	HPF1	0.126	2.51	0.105	-2.47
SPAC231A1.09	SPAC231A1.09	0.048	-0.01	0.042	-0.01
YDL054C	MCH1	0.11	0.95	0.083	-0.97
SPAC1F12.03c	SPAC1F12.03c	0.091	-0.06	0.071	-0.06
YDR486C	VPS60	0.176	-0.5	0.139	-0.52
YLR424W	SPP382	0.196	-0.49	0.151	-0.53
YHL039W	EFM1	0.061	-0.63	0.148	-0.42
YER155C	BEM2	0.063	-0.55	0.029	-0.68
YLR319C	BUD6	0.129	-0.67	0.095	-0.7
YDL073W	YDL073W	0.055	-0.9	0.154	-0.58
YMR172W	HOT1	0.139	-0.62	0.028	-1.03
YMR281W	GPI12	0.157	-0.9	0.166	-0.83
YJR050W	ISY1	0.141	-0.88	0.096	-0.95
YGL203C	KEX1	0.167	-0.97	0.188	-0.88
YOR174W	MED4	0.156	-0.99	0.169	-0.89
YKL206C	ADD66	0.101	-1.11	0.166	-0.83
YDR484W	VPS52	0.114	-0.82	0.035	-1.15
YGR270W	YTA7	0.144	-1.01	0.116	-1.03
YLR272C	YCS4	0.039	-1.01	0.031	-1.05
YGR196C	FYV8	0.138	-1.13	0.158	-0.98
YJR088C	EMC2	0.144	-1.13	0.165	-0.99
YDR113C	PDS1	0.056	-1.05	0.048	-1.07
YLR273C	PIG1	0.11	-1.16	0.131	-0.99
YPL249C	GYP5	0.088	-1.09	0.074	-1.06
YGR186W	TFG1	0.07	-0.73	0.005	-1.43
YLR420W	URA4	0.135	-1	0.065	-1.21
YKL189W	HYM1	0.173	-0.79	0.028	-1.47
YLR086W	SMC4	0.152	-1.23	0.177	-1.07
YPL009C	TAE2	0.007	-1.15	0.006	-1.16
YKL140W	TGL1	0.064	-1.33	0.118	-1.01
YJR134C	SGM1	0.142	-1.24	0.16	-1.1
YKL113C	RAD27	0.181	-1.23	0.195	-1.13
YOR389W	YOR389W	0.194	-1.08	0.118	-1.28
YOR092W	ECM3	0.091	-1.22	0.083	-1.15
YGL201C	MCM6	0.188	-0.99	0.062	-1.49
YFL013C	IES1	0.096	-1.51	0.195	-1.03
YGL064C	MRH4	0.156	-1.28	0.129	-1.3
YBL091C-A	SCS22	0.052	-1.26	0.037	-1.33
YEL018W	EAF5	0.144	-1.43	0.179	-1.21
YMR180C	CTL1	0.157	-1.3	0.126	-1.35
YNL214W	PEX17	0.164	-1.45	0.187	-1.29
YMR313C	TGL3	0.11	-1.62	0.187	-1.19
YKR023W	YKR023W	0.144	-1.62	0.199	-1.3
YAL051W	OAF1	0.132	-1.59	0.162	-1.35
YNL133C	FYV6	0.156	-1.59	0.175	-1.42
YCR096C	HMRA2	0.118	-1.47	0.082	-1.56
YIL156W	UBP7	0.091	-1.61	0.084	-1.51
YOL112W	MSB4	0.125	-1.74	0.16	-1.45
YER173W	RAD24	0.106	-1.98	0.166	-1.51
YFR026C	ULI1	0.172	-1.86	0.197	-1.66
YKR086W	PRP16	0.118	-1.98	0.172	-1.56
YLL042C	ATG10	0.176	-1.83	0.177	-1.74
YOR368W	RAD17	0.091	-2.11	0.155	-1.56
YDL239C	ADY3	0.139	-1.94	0.136	-1.79
YKR095W	MLP1	0.073	-1.96	0.078	-1.8
YLR451W	LEU3	0.142	-1.99	0.137	-1.86
YDL219W	DTD1	0.186	-2.03	0.179	-1.98
YAR029W	YAR029W	0.173	-1.96	0.116	-2.23
YAL068C	PAU8	0.038	-2.2	0.044	-2.01
YER109C	FLO8	0.121	-1.87	0.051	-2.41
YAL037W	YAL037W	0.028	-2.58	0.052	-2.13
YOL114C	YOL114C	0.152	-2.57	0.185	-2.2
YHR152W	SPO12	0.158	-2.05	0.058	-2.89
YKR015C	YKR015C	0.166	-2.27	0.058	-3.28
YKL216W	URA1	0.022	-2.46	0.007	-3.19
YJR005C-A	YJR005C-A	0.15	-2.54	0.065	-3.3
YPL165C	SET6	0.172	-3.08	0.152	-3.11
YIL176C	PAU14	0.144	-3.29	0.136	-3.12
YJL194W	CDC6	0.19	-3.42	0.179	-3.38
YAL037C-A	YAL037C-A	0.155	-3.15	0.083	-3.76
