# Supplementary material for: Functional genomic analysis reveals overlapping and distinct features of chronologically long-lived yeast populations
Source: Aging (Albany NY). 2015 Mar 7;7(3):177–94. doi: 10.18632/aging.100729 (PMC4394729; doi:10.18632/aging.100729)
Supplement: Supplementary file 2 [file aging-07-0177-s002.xlsx]

## Sheet: Sheet1
Supplemental Table S2. Fold changes (log2) in transcription relative to WT NR
		CR conc.		INAM
ORF	Description	p-value	Fold Change	p-value	Fold Change
YNL300W	TOS6	0.007	7.92	0.002	7.98
YOR247W	SRL1	0.082	6.08	0.048	6.3
YIL169C	YIL169C	0.025	6.56	0.04	4.82
YJL158C	CIS3	0.009	5.04	0.002	6.01
YKR013W	PRY2	0.001	5.14	0.001	5.7
YBR067C	TIP1	0.052	5	0.021	5.56
YHR143W	DSE2	0.013	4.35	0.001	6.13
YNL289W	PCL1	0.058	4.93	0.041	4.71
YLR286C	CTS1	0.001	4.16	0	5.45
YOL007C	CSI2	0.014	4.89	0.012	4.55
YOL155C	HPF1	0.014	5.33	0.013	4.03
YIL123W	SIM1	0.025	4.41	0.013	4.95
YMR199W	CLN1	0.156	4.25	0.074	4.84
YMR251W	GTO3	0.114	4.48	0.053	4.57
YML027W	YOX1	0.083	3.91	0.062	3.73
YJL079C	PRY1	0.07	3.3	0.019	4.28
YNL283C	WSC2	0.057	3.22	0.017	4.15
YKL096W	CWP1	0.192	3.49	0.102	3.87
YGR108W	CLB1	0.023	3.43	0.006	3.87
YKL096W-A	CWP2	0.017	3.49	0.007	3.69
YER124C	DSE1	0.023	2.76	0.001	4.38
YPL036W	PMA2	0.065	2.71	0.018	4.14
YGR088W	CTT1	0.159	3.46	0.105	3.12
YER070W	RNR1	0.123	2.8	0.04	3.73
YBR162C	TOS1	0.048	2.71	0.012	3.71
YPL067C	YPL067C	0.19	2.89	0.09	3.51
YOL154W	ZPS1	0.152	2.84	0.089	3.2
YNL190W	YNL190W	0.08	3.27	0.07	2.7
YBR071W	YBR071W	0.07	2.79	0.036	3.05
YNR067C	DSE4	0.165	2.3	0.041	3.22
YPR119W	CLB2	0.094	2.63	0.077	2.85
YGL008C	PMA1	0.193	2.6	0.105	2.87
YKL164C	PIR1	0.06	2.43	0.023	2.87
YOR302W	YOR302W	0.083	2.35	0.04	2.68
YLR315W	NKP2	0.07	2.29	0.019	2.59
YKL086W	SRX1	0.114	1.8	0.036	3
YJL078C	PRY3	0.062	1.7	0.002	3.08
YER011W	TIR1	0.085	2.94	0.196	1.8
YPL163C	SVS1	0.038	2.33	0.015	2.37
YML052W	SUR7	0.186	1.73	0.023	2.89
YIL169C	YIL169C	0.014	3.26	0.036	1.29
YOR301W	RAX1	0.196	1.97	0.072	2.56
YMR305C	SCW10	0.196	2	0.085	2.5
YHR033W	YHR033W	0.112	2.15	0.081	2.22
YOL019W	YOL019W	0.198	2.16	0.146	2.15
YJL045W	YJL045W	0.14	2.21	0.164	2.1
YGR279C	SCW4	0.014	1.91	0.002	2.34
YCR059C	YIH1	0.078	2.05	0.041	2.2
YMR084W	YMR084W	0.057	1.84	0.01	2.37
YOL011W	PLB3	0.053	1.64	0.009	2.52
YMR307W	GAS1	0.138	1.55	0.034	2.42
YPL231W	FAS2	0.012	1.8	0.002	2.14
YML056C	IMD4	0.112	1.43	0.004	2.51
YGR014W	MSB2	0.151	1.72	0.059	2.14
YJL083W	TAX4	0.06	2.33	0.128	1.49
YGL055W	OLE1	0.167	1.99	0.155	1.75
YLR372W	SUR4	0.033	1.12	0.002	2.59
YJR105W	ADO1	0.022	1.22	0.002	2.26
YOR306C	MCH5	0.074	1.83	0.081	1.58
YFL037W	TUB2	0.07	1.81	0.051	1.6
YFR044C	DUG1	0.128	1.51	0.053	1.79
YMR246W	FAA4	0.017	1.68	0.015	1.56
YLR212C	TUB4	0.033	1.45	0.015	1.75
YNR044W	AGA1	0.111	1.75	0.123	1.45
YKL185W	ASH1	0.083	1.38	0.031	1.81
YJL118W	YJL118W	0.123	1.27	0.033	1.91
YDR453C	TSA2	0.05	1.19	0.015	1.98
YML085C	TUB1	0.106	1.4	0.053	1.72
YNL307C	MCK1	0.076	1.46	0.035	1.63
YCR034W	FEN1	0.025	1.09	0.002	1.96
YGL178W	MPT5	0.025	1.74	0.048	1.3
YNL271C	BNI1	0.075	1.75	0.089	1.29
YIL121W	QDR2	0.183	1.32	0.072	1.71
YGR175C	ERG1	0.046	1.35	0.012	1.68
YKL052C	ASK1	0.108	1.12	0.011	1.88
YHR126C	ANS1	0.151	1.42	0.039	1.45
YOL020W	TAT2	0.057	1.23	0.015	1.61
YKL035W	UGP1	0.03	1.14	0.006	1.69
YBL032W	HEK2	0.114	1.66	0.182	1.17
YGL032C	AGA2	0.159	1.3	0.09	1.51
YMR006C	PLB2	0.014	1.5	0.046	1.28
YLR378C	SEC61	0.094	1.19	0.042	1.57
YLR108C	YLR108C	0.161	1.52	0.191	1.23
YNL148C	ALF1	0.139	1.15	0.029	1.56
YHR086W	NAM8	0.173	1.3	0.095	1.39
YNL322C	KRE1	0.025	1.49	0.048	1.16
YER062C	HOR2	0.08	1.29	0.072	1.3
YPR052C	NHP6A	0.094	1.27	0.041	1.29
YLR084C	RAX2	0.139	1.43	0.141	1.12
YER043C	SAH1	0.057	0.84	0.003	1.7
YNL158W	PGA1	0.108	1.24	0.074	1.27
YJR065C	ARP3	0.151	1.12	0.068	1.36
YER132C	PMD1	0.15	1.44	0.181	1.04
YML019W	OST6	0.122	1.01	0.034	1.46
YMR079W	SEC14	0.114	1.03	0.054	1.38
YOL122C	SMF1	0.134	0.89	0.026	1.51
YML126C	ERG13	0.074	0.98	0.019	1.41
YMR276W	DSK2	0.169	0.93	0.021	1.42
YNR043W	MVD1	0.094	1.19	0.095	1.09
YNL106C	INP52	0.065	1.02	0.078	1.2
YJL121C	RPE1	0.11	0.92	0.052	1.26
YGL211W	NCS6	0.094	1.13	0.069	1.03
YGL225W	VRG4	0.165	0.71	0.015	1.42
YNL321W	VNX1	0.182	0.94	0.079	1.19
YEL036C	ANP1	0.072	0.99	0.033	1.13
YHR042W	NCP1	0.18	0.8	0.041	1.3
YDL226C	GCS1	0.022	0.79	0.007	1.29
YML051W	GAL80	0.065	1.05	0.026	1.03
YGR026W	YGR026W	0.183	0.71	0.033	1.32
YJR113C	RSM7	0.042	0.87	0.01	1.15
YPL028W	ERG10	0.079	1.02	0.048	0.98
YDR345C	HXT3	0.112	1.21	0.085	0.78
YER026C	CHO1	0.13	0.83	0.04	1.15
YDL212W	SHR3	0.014	0.97	0.005	1.01
YLR347C	KAP95	0.06	1.04	0.103	0.93
YDR420W	HKR1	0.096	0.9	0.034	1.07
YDR204W	COQ4	0.171	1.04	0.159	0.92
YER120W	SCS2	0.042	0.89	0.027	1.05
YOR099W	KTR1	0.083	1.23	0.154	0.69
YER004W	FMP52	0.075	1.1	0.096	0.8
YHR133C	NSG1	0.111	0.9	0.042	0.97
YLR110C	CCW12	0.112	0.89	0.08	0.88
YMR205C	PFK2	0.017	0.81	0.006	0.95
YMR202W	ERG2	0.106	0.63	0.033	1.11
YHR074W	QNS1	0.157	0.76	0.046	0.97
YNL069C	RPL16B	0.074	0.56	0.002	1.17
YOL103W	ITR2	0.094	0.72	0.048	1
YDL224C	WHI4	0.171	0.78	0.075	0.93
YPL085W	SEC16	0.106	0.97	0.126	0.73
YHR174W	ENO2	0.169	0.71	0.048	0.97
YEL031W	SPF1	0.046	0.97	0.064	0.7
YOR085W	OST3	0.161	0.79	0.094	0.87
YCR004C	YCP4	0.165	0.75	0.105	0.9
YER010C	YER010C	0.083	0.97	0.077	0.66
YCR028C	FEN2	0.058	0.79	0.027	0.84
YDR453C	ICE2	0.145	0.81	0.103	0.79
YDL015C	TSC13	0.047	0.63	0.015	0.96
YOR239W	ABP140	0.159	0.7	0.072	0.88
YLR208W	SEC13	0.169	0.85	0.157	0.72
YBR286W	APE3	0.167	0.7	0.042	0.87
YKR042W	UTH1	0.106	0.67	0.034	0.89
YEL032W	MCM3	0.094	0.58	0.021	0.95
YNL115C	YNL115C	0.059	0.8	0.035	0.69
YMR243C	ZRC1	0.143	0.82	0.128	0.67
YGR255C	COQ6	0.122	0.48	0	1
YOL061W	PRS5	0.172	0.48	0.015	0.99
YOR098C	NUP1	0.09	0.77	0.08	0.68
YPL170W	DAP1	0.114	0.47	0.003	0.98
YIR006C	PAN1	0.169	0.48	0.069	0.95
YGL019W	CKB1	0.184	0.78	0.175	0.58
YDR191W	HST4	0.159	0.66	0.076	0.69
YDR238C	SEC26	0.077	0.67	0.066	0.67
YJL005W	CYR1	0.083	0.86	0.166	0.48
YOL038W	PRE6	0.025	0.6	0.003	0.73
YOR157C	PUP1	0.165	0.52	0.048	0.74
YLR231C	BNA5	0.076	0.47	0.007	0.77
YLR109W	AHP1	0.048	0.59	0.021	0.61
YOL075C	YOL075C	0.057	0.48	0.048	0.69
YPL234C	TFP3	0.057	0.53	0.015	0.58
YKR050W	TRK2	0.156	0.52	0.144	0.53
YLR293C	GSP1	0.184	0.38	0.046	0.6
YCR030C	SYP1	0.108	0.39	0.133	0.57
YCR012W	PGK1	0.083	0.49	0.048	0.46
YDR338C	YDR338C	0.114	0.51	0.155	0.42
YPL048W	CAM1	0.102	0.51	0.114	0.41
YLR354C	TAL1	0.065	0.48	0.051	0.41
YDR155C	CPR1	0.147	0.39	0.074	0.47
YOL072W	THP1	0.062	0.5	0.144	0.3
YML028W	TSA1	0.065	0.31	0.01	0.45
YDR385W	EFT2	0.14	0.29	0.031	0.36
YAL038W	CDC19	0.183	0.31	0.154	0.25
YER074W	RPS24A	0.171	0.17	0.025	0.35
YBR189W	RPS9B	0.131	-0.22	0.004	0.58
YCL045C	EMC1	0.131	-0.16	0.079	0.41
YPL079W	RPL21B	0.065	-0.24	0.023	0.46
YIL066C	RNR3	0.175	0.75	0.187	-0.74
YBR191W	RPL21A	0.119	-0.32	0.137	0.26
YGR210C	YGR210C	0.017	-0.44	0.053	0.37
YBR191W	RPL21A	0.108	-0.17	0.19	0.1
YGL076C	RPL7A	0.06	-0.28	0.046	0.21
YHL015W	RPS20	0.028	-0.27	0.041	0.19
YLL045C	RPL8B	0.096	-0.51	0.083	0.4
YIL010W	DOT5	0.063	-0.45	0.199	0.27
YOR071C	NRT1	0.094	0.59	0.08	-0.81
YOL012C	HTZ1	0.196	-0.17	0.141	-0.34
YDR226W	ADK1	0.08	-0.3	0.108	-0.22
YPL112C	PEX25	0.017	-0.89	0.089	0.35
YML112W	CTK3	0.197	-0.27	0.136	-0.36
YMR275C	BUL1	0.064	-0.34	0.093	-0.4
YER009W	NTF2	0.137	-0.38	0.108	-0.37
YKR002W	PAP1	0.132	-0.39	0.085	-0.4
YPR019W	MCM4	0.183	-0.45	0.169	-0.34
YGR013W	SNU71	0.114	-0.31	0.175	-0.49
YGL216W	KIP3	0.14	-0.36	0.082	-0.51
YPL125W	KAP120	0.072	-0.58	0.142	-0.45
YKL167C	MRP49	0.057	-0.54	0.055	-0.51
YLR387C	REH1	0.151	-0.58	0.102	-0.49
YOL053W	AIM39	0.058	-0.5	0.051	-0.57
YMR083W	ADH3	0.073	-0.51	0.026	-0.57
YLL036C	PRP19	0.132	-0.58	0.111	-0.51
YMR064W	AEP1	0.197	-0.48	0.136	-0.61
YML081W	TDA9	0.094	-0.51	0.072	-0.61
YOR341W	RPA190	0.167	-0.58	0.164	-0.55
YMR274C	RCE1	0.179	-0.63	0.133	-0.51
YPR129W	SCD6	0.183	-0.63	0.109	-0.51
YCR002C	CDC10	0.023	-0.71	0.041	-0.46
YGL016W	KAP122	0.114	-0.61	0.123	-0.58
YDR189W	SLY1	0.077	-0.55	0.041	-0.66
YBL017C	PEP1	0.165	-0.65	0.055	-0.59
YBR201W	DER1	0.017	-0.57	0.009	-0.68
YDL193W	NUS1	0.025	-0.74	0.041	-0.54
YPR134W	MSS18	0.175	-0.6	0.086	-0.69
YGL107C	RMD9	0.168	-0.59	0.146	-0.71
YIL088C	AVT7	0.083	-0.79	0.143	-0.53
YNL032W	SIW14	0.11	-0.57	0.038	-0.77
YOR241W	MET7	0.176	-0.53	0.019	-0.81
YDR103W	STE5	0.196	-0.66	0.096	-0.69
YNL244C	SUI1	0.038	-0.48	0.009	-0.88
YMR268C	PRP24	0.094	-0.71	0.142	-0.65
YDR323C	PEP7	0.077	-0.64	0.103	-0.73
YPL024W	RMI1	0.074	-0.72	0.133	-0.67
YDL132W	CDC53	0.125	-0.81	0.093	-0.59
YKL206C	ADD66	0.094	-0.78	0.028	-0.63
YOR256C	TRE2	0.057	-0.73	0.053	-0.71
YPL263C	KEL3	0.183	-0.65	0.072	-0.83
YHR162W	MPC2	0.108	-0.79	0.066	-0.69
YGL233W	SEC15	0.065	-0.83	0.041	-0.66
YOL043C	NTG2	0.161	-0.85	0.192	-0.66
YLR166C	SEC10	0.135	-0.9	0.167	-0.62
YDL069C	CBS1	0.084	-0.81	0.07	-0.71
YDR339C	FCF1	0.112	-0.81	0.085	-0.71
YKR064W	OAF3	0.151	-0.75	0.041	-0.77
YLR165C	PUS5	0.08	-0.52	0.008	-1.01
YML015C	TAF11	0.06	-1.01	0.139	-0.52
YGR264C	MES1	0.185	-0.93	0.18	-0.6
YPR161C	SGV1	0.196	-0.74	0.111	-0.79
YLR233C	EST1	0.195	-0.87	0.113	-0.67
YKL156W	RPS27A	0.122	-0.85	0.154	-0.69
YDR228C	PCF11	0.088	-0.87	0.126	-0.71
YBR044C	TCM62	0.057	-0.87	0.052	-0.73
YBR270C	BIT2	0.119	-0.81	0.075	-0.81
YDR416W	SYF1	0.119	-0.77	0.054	-0.85
YNL232W	CSL4	0.052	-0.82	0.061	-0.8
YDR289C	RTT103	0.065	-0.62	0.015	-1.01
YDL216C	RRI1	0.105	-0.96	0.181	-0.68
YBR137W	YBR137W	0.115	-0.79	0.055	-0.86
YLR306W	UBC12	0.188	-0.82	0.102	-0.85
YGR169C	PUS6	0.058	-1.09	0.19	-0.58
YNL249C	MPA43	0.014	-0.7	0.005	-0.98
YMR026C	PEX12	0.014	-1.02	0.02	-0.66
YGR104C	SRB5	0.057	-1.08	0.068	-0.61
YPL022W	RAD1	0.103	-0.75	0.026	-0.94
YGL247W	BRR6	0.094	-0.91	0.185	-0.78
YDR168W	CDC37	0.112	-0.84	0.08	-0.86
YLR285C-A	YLR285C-A	0.07	-1.22	0.121	-0.48
YKL012W	PRP40	0.079	-0.96	0.074	-0.75
YGR276C	RNH70	0.111	-0.73	0.061	-0.98
YPR079W	MRL1	0.042	-0.89	0.042	-0.83
YBR288C	APM3	0.001	-0.92	0.026	-0.8
YMR137C	PSO2	0.173	-0.66	0.069	-1.07
YLR451W	LEU3	0.083	-0.82	0.048	-0.92
YGR278W	CWC22	0.169	-0.91	0.085	-0.84
YNL133C	FYV6	0.084	-0.94	0.156	-0.81
YLL015W	BPT1	0.057	-0.81	0.015	-0.97
YOR211C	MGM1	0.144	-0.47	0.003	-1.33
YGL015C	YGL015C	0.038	-1.05	0.002	-0.77
YMR220W	ERG8	0.017	-1.08	0.023	-0.75
YGL141W	HUL5	0.161	-0.81	0.075	-1.06
YDR131C	YDR131C	0.152	-0.95	0.095	-0.94
YJR119C	JHD2	0.188	-0.77	0.081	-1.13
YER014C-A	BUD25	0.074	-0.66	0.002	-1.26
YDL005C	MED2	0.127	-0.69	0.034	-1.25
YDL117W	CYK3	0.013	-1.25	0.029	-0.7
YGR100W	MDR1	0.11	-1.08	0.103	-0.88
YCL029C	BIK1	0.094	-1.03	0.079	-0.94
YDL176W	YDL176W	0.105	-0.87	0.074	-1.11
YOR322C	LDB19	0.106	-0.92	0.053	-1.06
YER170W	ADK2	0.038	-1.07	0.023	-0.93
YLR227C	ADY4	0.114	-0.97	0.085	-1.03
YOR380W	RDR1	0.083	-1.16	0.095	-0.88
YOR327C	SNC2	0.119	-0.91	0.035	-1.15
YNL255C	GIS2	0.057	-1.15	0.057	-0.94
YAL047C	SPC72	0.185	-0.95	0.111	-1.18
YMR232W	FUS2	0.163	-1.2	0.194	-0.97
YBR257W	POP4	0.094	-1.07	0.022	-1.12
YMR283C	RIT1	0.065	-1.14	0.065	-1.07
YNL157W	IGO1	0.127	-1.14	0.105	-1.08
YKR082W	NUP133	0.112	-1.2	0.093	-1.03
YLL003W	SFI1	0.182	-1.02	0.086	-1.21
YOL137W	BSC6	0.114	-1.31	0.17	-0.93
YPL034W	YPL034W	0.169	-1.05	0.064	-1.2
YBR228W	SLX1	0.028	-1.2	0.004	-1.08
YDR078C	SHU2	0.197	-1.16	0.126	-1.12
YKR078W	YKR078W	0.058	-0.87	0.018	-1.42
YDR201W	SPC19	0.196	-0.87	0.043	-1.42
YCR095C	OCA4	0.057	-1.3	0.016	-1
YJR141W	YJR141W	0.048	-1.03	0.015	-1.28
YGL043W	DST1	0.14	-1.28	0.151	-1.08
YDR080W	VPS41	0.057	-1.2	0.016	-1.17
YNL222W	SSU72	0.118	-1.39	0.154	-1.01
YLR228C	ECM22	0.038	-0.9	0	-1.51
YBR258C	SHG1	0.057	-1.05	0.05	-1.38
YLR318W	EST2	0.063	-1.36	0.053	-1.08
YLR456W	YLR456W	0.058	-1.19	0.022	-1.34
YER188C-A	YER188C-A	0.09	-0.81	0.012	-1.75
YBR268W	MRPL37	0.179	-1.25	0.143	-1.37
YDR268W	MSW1	0.139	-1.26	0.056	-1.38
YFR043C	IRC6	0.056	-1.22	0.004	-1.48
YGR239C	PEX21	0.023	-1.3	0.013	-1.43
YAR028W	YAR028W	0.114	-1.34	0.039	-1.5
YKL049C	CSE4	0.06	-1.39	0.015	-1.47
YDR068W	DOS2	0.196	-1.15	0.053	-1.77
YGL235W	YGL235W	0.001	-1.6	0.018	-1.33
YMR233W	TRI1	0.048	-0.86	0.002	-2.08
YDR444W	YDR444W	0.094	-1.62	0.081	-1.59
YAR029W	YAR029W	0.06	-1.63	0.023	-1.62
YDR295C	HDA2	0.057	-1.62	0.024	-1.66
YLR420W	URA4	0.058	-2	0.105	-1.38
YOR384W	FRE5	0.057	-1.02	0.011	-2.37
YFR030W	MET10	0.037	-2.02	0.048	-1.59
YML054C-A	YML054C-A	0.03	-1.84	0.021	-1.82
YOR349W	CIN1	0.125	-2.05	0.154	-1.76
YHR035W	YHR035W	0.121	-1.82	0.133	-2
YCL001W-A	YCL001W-A	0.017	-1.72	0.003	-2.27
YIR018C-A	YIR018C-A	0.013	-2.46	0.035	-1.76
YOL047C	YOL047C	0.186	-2.56	0.156	-1.83
YDR540C	IRC4	0.017	-2.2	0.023	-2.91
YPR167C	MET16	0.077	-2.62	0.072	-2.67
YDL247W	MPH2	0.053	-3.5	0.155	-2.31
YBL100W-C	YBL100W-C	0.017	-2.54	0.002	-3.35
YNL034W	YNL034W	0.004	-4.1	0.074	-2.01
YCL026C-A	FRM2	0.151	-2.83	0.034	-3.4
YPR159C-A	YPR159C-A	0.047	-3.31	0.002	-3.52
YGR273C	YGR273C	0.037	-2.23	0.002	-5.26
YCR108C	YCR108C	0.042	-4.21	0.026	-3.94
YLR012C	YLR012C	0.076	-4.06	0.02	-4.62
YBR294W	SUL1	0.145	-3.24	0.025	-5.93
YBR219C	YBR219C	0.094	-4.43	0.048	-4.79
